# Supplementary material for: Estimating the yield of tuberculosis from key populations to inform targeted interventions in South Africa: a scoping review
Source: PubMed Central journal article supplement — BMJ Glob Health. 2020 Jul 6;5(7):e002355. doi: 10.1136/bmjgh-2020-002355 (PMC7342464; doi:10.1136/bmjgh-2020-002355), 2020-07-06
Supplement: bmjgh-2020-002355supp001.pdf [file bmjgh-2020-002355supp001.pdf]

## Supplementary information

### Supplementary 1: Key to calculations

Relative risk of tuberculosis calculated as

$$RR = \frac{TB \text{ incidence in key population}}{TB \text{ incidence in general population}}$$

Number to be screened to find one case calculated using the prevalence

$$NNS = \frac{1}{TB \text{ prevalence in key population}}$$

Number of tuberculosis cases reported calculated from the absolute population and the incidence of tuberculosis per 100,000

$$\text{Number of cases} = \frac{TB \text{ incidence in key population}}{100,000} * \text{Size of key population}$$

Overall contribution to tuberculosis epidemic calculated by the number of tuberculosis cases in each risk group over the cases in the general population

$$\text{Overall contribution} = \frac{\text{Number of cases reported in key population}}{\text{Total number of cases reported in general population}} * 100$$

Population attributable fraction calculated as a percentage from prevalence and relative risk

$$PAF = \left\{ \left( \text{prevalence} * \left( \frac{RR-1}{1} \right) \right) + (\text{prevalence} * (RR - 1)) \right\} * 100$$

## Supplementary 2: Summary of observational studies quality

| Key population        | Author and Year            | Study duration | Study design | Scores           |                    | Total     |
|-----------------------|----------------------------|----------------|--------------|------------------|--------------------|-----------|
|                       |                            |                |              | Diagnosis method | Sample size        |           |
| <b>Prevalence</b>     |                            |                |              |                  |                    |           |
| Healthcare workers    | Kranzer et al. (2010)      | 1              | 1            | 4                | 1                  | 7         |
| Healthcare workers    | Naidoo and Jinabhai (2006) | 4              | 1            | 4                | 2                  | 11        |
| Mineworkers           | Lewis et al. (2013)        | 3              | 1            | 4                | 4                  | 12        |
| Inmates               | Nyasulu et al. (2015)      | 2              | 1            | 3                | 2                  | 8         |
| Inmates               | Telisinghe et al. (2014)   | 2              | 1            | 4                | 1                  | 8         |
| Inmates               | Zishiri et al. (2015)      | 1              | 2            | 4                | 3                  | 10        |
| Inmates               | Hanifa et al. (2015)       | 2              | 1            | 2                | 1                  | 6         |
| Informal settlements  | Wood et al. (2007)         | 3              | 2            | 4                | 1                  | 10        |
| Informal settlements  | Kranzer et al. (2012)      | 4              | 1            | 4                | 3                  | 12        |
| Informal settlements  | Dawson et al. (2010)       | 1              | 1            | 2                | 1                  | 5         |
| Tuberculosis Contacts | Shapiro et al. (2012)      | 1              | 2            | 4                | 2                  | 9         |
| Tuberculosis Contacts | Thind et al. (2012)        | 3              | 2            | 4                | 2                  | 11        |
| Tuberculosis Contacts | Van Schalkwyk et al (2014) | 1              | 1            | 4                | 1                  | 7         |
| Tuberculosis Contacts | Deery et al. (2014)        | 1              | 2            | 4                | 2                  | 9         |
| Children under-five   | Bekker et al. (2012)       | 3              | 2            | 4                | 1                  | 10        |
| Children under-five   | Seddon et al (2013)        | 2              | 1            | 4                | 1                  | 8         |
| Children under-five   | Frigati et al. (2010)      | 4              | 3            | 4                | 1                  | 12        |
| Pregnant women        | Hoffman et al. (2013)      | 3              | 1            | 2                | 2                  | 8         |
| Pregnant women        | Bekker et al. (2016)       | 2              | 3            | 4                | 3                  | 12        |
| Pregnant women        | Peters et al. (2015)       | 2              | 1            | 4                | 1                  | 8         |
| Pregnant women        | Gounder et al. (2011)      | 2              | 1            | 4                | 2                  | 9         |
| HIV-infected          | Naidoo et al. (2014)       | 4              | 3            | 3                | 1                  | 11        |
| HIV-infected          | Goulab et al. (2009)       | 4              | 3            | 4                | 2                  | 13        |
| HIV-infected          | Lawn et al. (2009)         | 4              | 3            | 4                | 1                  | 12        |
| HIV-infected          | Hanifa et al. (2012)       | 2              | 1            | 4                | 1                  | 7         |
| <b>Incidence</b>      |                            |                |              |                  |                    |           |
| Healthcare workers    | Ayuk et al. (2013)         | 4              | 2            | 4                | 1                  | 11        |
| Healthcare workers    | Tudor et al. (2014)        | 4              | 2            | 4                | 2                  | 12        |
| Mineworkers           | Hermans et al. (2016)      | 4              | 3            | 4                | 4                  | 15        |
| Mineworkers           | Sonnenberg et al. (2005)   | 4              | 3            | 4                | 4                  | 15        |
| HIV-infected          | Naidoo et al. (2014)       | 4              | 3            | 3                | 1                  | 11        |
| HIV-infected          | Goulab et al. (2009)       | 4              | 3            | 4                | 2                  | 13        |
| HIV-infected          | Lawn et al. (2009)         | 4              | 3            | 4                | 1                  | 12        |
| Children under-five   | Hesseling et al.           | 4              | 3            | 4                | 1                  | 12        |
| Children under-five   | Zar et al. (2010)          | 4              | 3            | 4                | 1                  | 12        |
| <b>Key</b>            |                            | 1              | < 6months    | Cross-sectional  | None mentioned     | <1000     |
|                       |                            | 2              | 6-12months   | Evaluation       | Symptoms screening | 1000-4999 |
|                       |                            | 3              | 13-24months  | Cohort           | Microscopy/x-rays  | 5000-9999 |
|                       |                            | 4              | >24months    | Trial            | Culture/smear      | ≥10000    |

## Supplementary 3: Summary of experimental studies quality

| Section                   | Item No | Item Checklist                                                                                                                                                                              | Lebina et al 2016 | Churchyard et al 2014 | Zar et al 2006 |
|---------------------------|---------|---------------------------------------------------------------------------------------------------------------------------------------------------------------------------------------------|-------------------|-----------------------|----------------|
| <b>Title and abstract</b> | 1a      | Identification as a randomised trial in the title                                                                                                                                           | 0                 | 1                     | 1              |
|                           | 1b      | Structured summary of trial design, methods, results, and conclusions                                                                                                                       | 1                 | 1                     | 1              |
| <b>Introduction</b>       |         |                                                                                                                                                                                             |                   |                       |                |
| Background                | 2a      | Scientific background and explanation of rationale                                                                                                                                          | 1                 | 1                     | 1              |
| Objectives                | 2b      | Specific objectives or hypotheses                                                                                                                                                           | 0                 | 1                     | 1              |
| <b>Methods</b>            |         |                                                                                                                                                                                             |                   |                       |                |
| Trial design              | 3a      | Description of trial design (such as parallel, factorial) including allocation ratio                                                                                                        | 1                 | 1                     | 1              |
|                           | 3b      | Important changes to methods after trial commencement (such as eligibility criteria), with reasons                                                                                          | 1                 | 0                     | 1              |
| Participants              | 4a      | Eligibility criteria for participants                                                                                                                                                       | 1                 | 1                     | 1              |
|                           | 4b      | Settings and locations where the data were collected                                                                                                                                        | 1                 | 1                     | 1              |
| Interventions             | 5       | The interventions for each group with sufficient details to allow replication, including how and when they were actually administered                                                       | 1                 | 1                     | 1              |
| Outcomes                  | 6a      | Completely defined pre-specified primary and secondary outcome measures, including how and when they were assessed                                                                          | 0                 | 1                     | 1              |
|                           | 6b      | Any changes to trial outcomes after the trial commenced, with reasons                                                                                                                       |                   |                       | 1              |
| Sample size               | 7a      | How sample size was determined                                                                                                                                                              | 0                 | 0                     | 1              |
|                           | 7b      | When applicable, explanation of any interim analyses and stopping guidelines                                                                                                                | 0                 | 0                     | 1              |
| Randomisation             | 8a      | Method used to generate the random allocation sequence                                                                                                                                      | 1                 | 0                     | 1              |
| Sequence generation       | 8b      | Type of randomisation; details of any restriction (such as blocking and block size)                                                                                                         |                   | 0                     | 1              |
|                           | 9       | Mechanism used to implement the random allocation sequence (such as sequentially numbered containers), describing any steps taken to conceal the sequence until interventions were assigned | 1                 | 0                     | 1              |
| Implementation            | 10      | Who generated the random allocation sequence, who enrolled participants, and who assigned participants to interventions                                                                     | 1                 | 0                     | 1              |
| Blinding                  | 11a     | If done, who was blinded after assignment to interventions and how                                                                                                                          | 0                 | 0                     | 1              |
|                           | 11b     | If relevant, description of the similarity of interventions                                                                                                                                 |                   | 0                     | 1              |
| Statistical methods       | 12a     | Statistical methods used to compare groups for primary and secondary outcomes                                                                                                               | 1                 | 1                     | 1              |
|                           | 12b     | Methods for additional analyses, such as subgroup analyses and adjusted analyses                                                                                                            | 1                 | 1                     | 1              |
| <b>Results</b>            |         |                                                                                                                                                                                             |                   |                       |                |
| Participant flow diagram  | 13a     | For each group, the numbers of participants who were randomly assigned, received intended treatment, and were analysed for the primary outcome                                              | 0                 | 1                     | 1              |

| Section                  | Item No | Item Checklist                                                                                                                                    | Lebina et al 2016 | Churchyard et al 2014 | Zar et al 2006 |
|--------------------------|---------|---------------------------------------------------------------------------------------------------------------------------------------------------|-------------------|-----------------------|----------------|
|                          | 13b     | For each group, losses and exclusions after randomisation, together with reasons                                                                  | 0                 | 1                     | 1              |
| Recruitment              | 14a     | Dates defining the periods of recruitment and follow-up                                                                                           | 1                 | 1                     | 1              |
|                          | 14b     | Why the trial ended or was stopped                                                                                                                | 0                 | 0                     | 1              |
| Baseline data            | 15      | A table showing baseline demographic and clinical characteristics for each group                                                                  | 1                 | 1                     | 1              |
| Numbers analysed         | 16      | For each group, number of participants (denominator) included in each analysis and whether the analysis was by original assigned groups           | 1                 | 1                     | 1              |
| Outcomes and estimation  | 17a     | For each primary and secondary outcome, results for each group, and the estimated effect size and its precision (such as 95% confidence interval) | 1                 | 1                     | 1              |
|                          | 17b     | For binary outcomes, presentation of both absolute and relative effect sizes is recommended                                                       | 0                 | 1                     | 1              |
| Ancillary analyses       | 18      | Results of any other analyses performed, including subgroup analyses and adjusted analyses, distinguishing pre-specified from exploratory         | 1                 | 1                     | 1              |
| Harms                    | 19      | All-important harms or unintended effects in each group                                                                                           | 0                 | 0                     | 1              |
| <b>Discussion</b>        |         |                                                                                                                                                   |                   |                       |                |
| Limitations              | 20      | Trial limitations, addressing sources of potential bias, imprecision, and, if relevant, multiplicity of analyses                                  | 0                 | 1                     | 0              |
| Generalisability         | 21      | Generalisability (external validity, applicability) of the trial findings                                                                         | 0                 | 1                     | 1              |
| Interpretation           | 22      | Interpretation consistent with results, balancing benefits and harms, and considering other relevant evidence                                     | 1                 | 1                     | 1              |
| <b>Other information</b> |         |                                                                                                                                                   |                   |                       |                |
| Registration             | 23      | Registration number and name of trial registry                                                                                                    | 0                 | 1                     | 1              |
| Protocol                 | 24      | Where the full trial protocol can be accessed, if available                                                                                       | 0                 | 1                     | 0              |
| Funding                  | 25      | Sources of funding and other support (such as supply of drugs), role of funders                                                                   | 0                 | 1                     | 1              |
| <b>Total score</b>       |         |                                                                                                                                                   | <b>18</b>         | <b>25</b>             | <b>35</b>      |

## Supplementary 4: Estimated size of key population and data sources

| Risk group                                                                                                        | Key population                     | Size of risk group as an absolute number | Risk group as % of the general population | Data Source                                                                                                                                   |
|-------------------------------------------------------------------------------------------------------------------|------------------------------------|------------------------------------------|-------------------------------------------|-----------------------------------------------------------------------------------------------------------------------------------------------|
| People with increased risk of tuberculosis due to occupational or community exposure                              | Healthcare workers                 | 231,111                                  | 0.4%                                      | Evidence to Inform South African Tuberculosis policies (EVISAT) Review 2014 on Health Care workers                                            |
|                                                                                                                   | Miners                             | 510,000                                  | 0.9%                                      | Chamber of Mines Annual Report 2015<br>EVISAT Review 2014 on Miners                                                                           |
|                                                                                                                   | Inmates                            | 162,000                                  | 0.3%                                      | Annual Report Department of Correctional Services 2015<br>EVISAT Review 2014 on Inmates                                                       |
|                                                                                                                   | Informal settlements               | 3,306,697                                | 6.1%                                      | Housing Development Authority report on the status of informal settlements in South Africa 2013<br>EVISAT Review 2014 on Informal settlements |
|                                                                                                                   | Tuberculosis contacts <sup>†</sup> | 1,621,296                                | 3.0%                                      | 2011 Census<br>2016 WHO tuberculosis report                                                                                                   |
| People with limited access to tuberculosis services                                                               | Children under 5 years             | 5,900,000                                | 10.6%                                     | EVISAT Review 2014 on Children<br>2015 Mid-year estimates<br>2011 National Census                                                             |
|                                                                                                                   | Elderly                            | 3,000,000                                | 5.6%                                      | 2015 Mid-year estimates<br>2011 National Census                                                                                               |
|                                                                                                                   | Migrants and refugees              | 1,458,000                                | 2.7%                                      | United Nations High Commission for Refugees (UNHCR) report 2014                                                                               |
|                                                                                                                   | Women                              | 24,635,900                               | 51.2%                                     | 2015 Mid-year estimates<br>2011 National Census                                                                                               |
| People at increased risk of tuberculosis due to biological or behavioural factors that compromise immune function | HIV infected                       | 5,510,000                                | 10.2%                                     | EVISAT Review 2014 on HIV infected<br>UNAIDS Global AIDS update 2016                                                                          |
|                                                                                                                   | Diabetics                          | 2,300,000                                | 4.3%                                      | Global Diabetes Score Card 2014                                                                                                               |
|                                                                                                                   | Pregnant women                     | 1,200,000                                | 2.2%                                      | 2015 Mid-year estimates                                                                                                                       |
|                                                                                                                   | Smokers                            | 9,504,000                                | 17.6%                                     | The National Health and Nutrition Examination Survey 2013                                                                                     |
|                                                                                                                   | Chronic alcohol users              | 8,300,000                                | 15.4%                                     | The National Health and Nutrition Examination Survey 2013<br>The Global Alcohol Report 2014                                                   |

<sup>†</sup> Population size of household contacts was determined by the number of TUBERCULOSIS cases reported in 2016 multiplied by the average household size reported in the last census (437 000\*3.6=1.6M)
