# Supplementary figures and images for: Estimating the yield of tuberculosis from key populations to inform targeted interventions in South Africa: a scoping review
Source: PubMed Central journal article supplement — BMJ Glob Health. 2020 Jul 6;5(7):e002355. doi: 10.1136/bmjgh-2020-002355 (PMC7342464; doi:10.1136/bmjgh-2020-002355), 2020-07-06

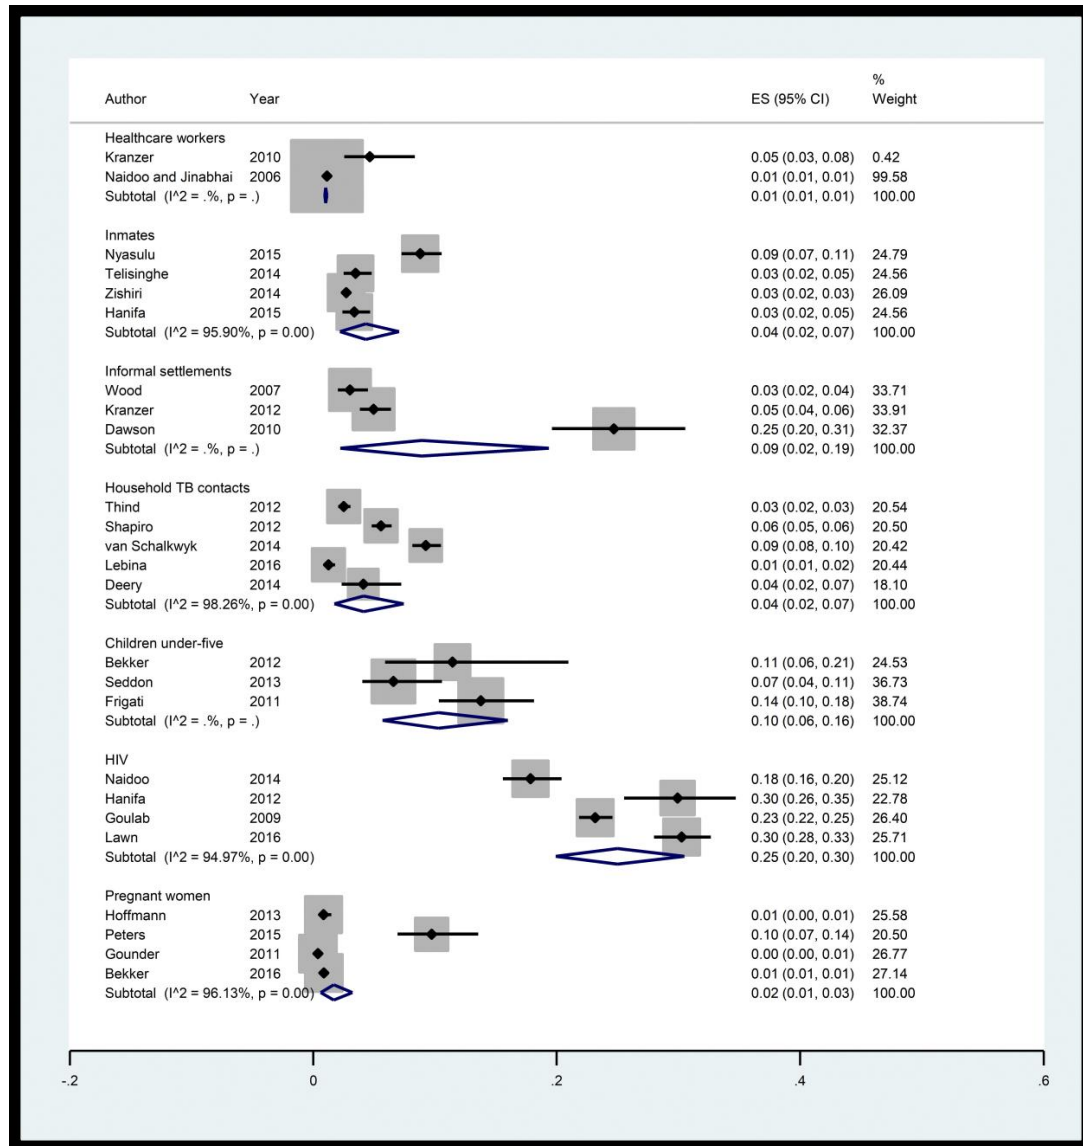

Supplement: bmjgh-2020-002355supp002.pdf [file bmjgh-2020-002355supp002.pdf]

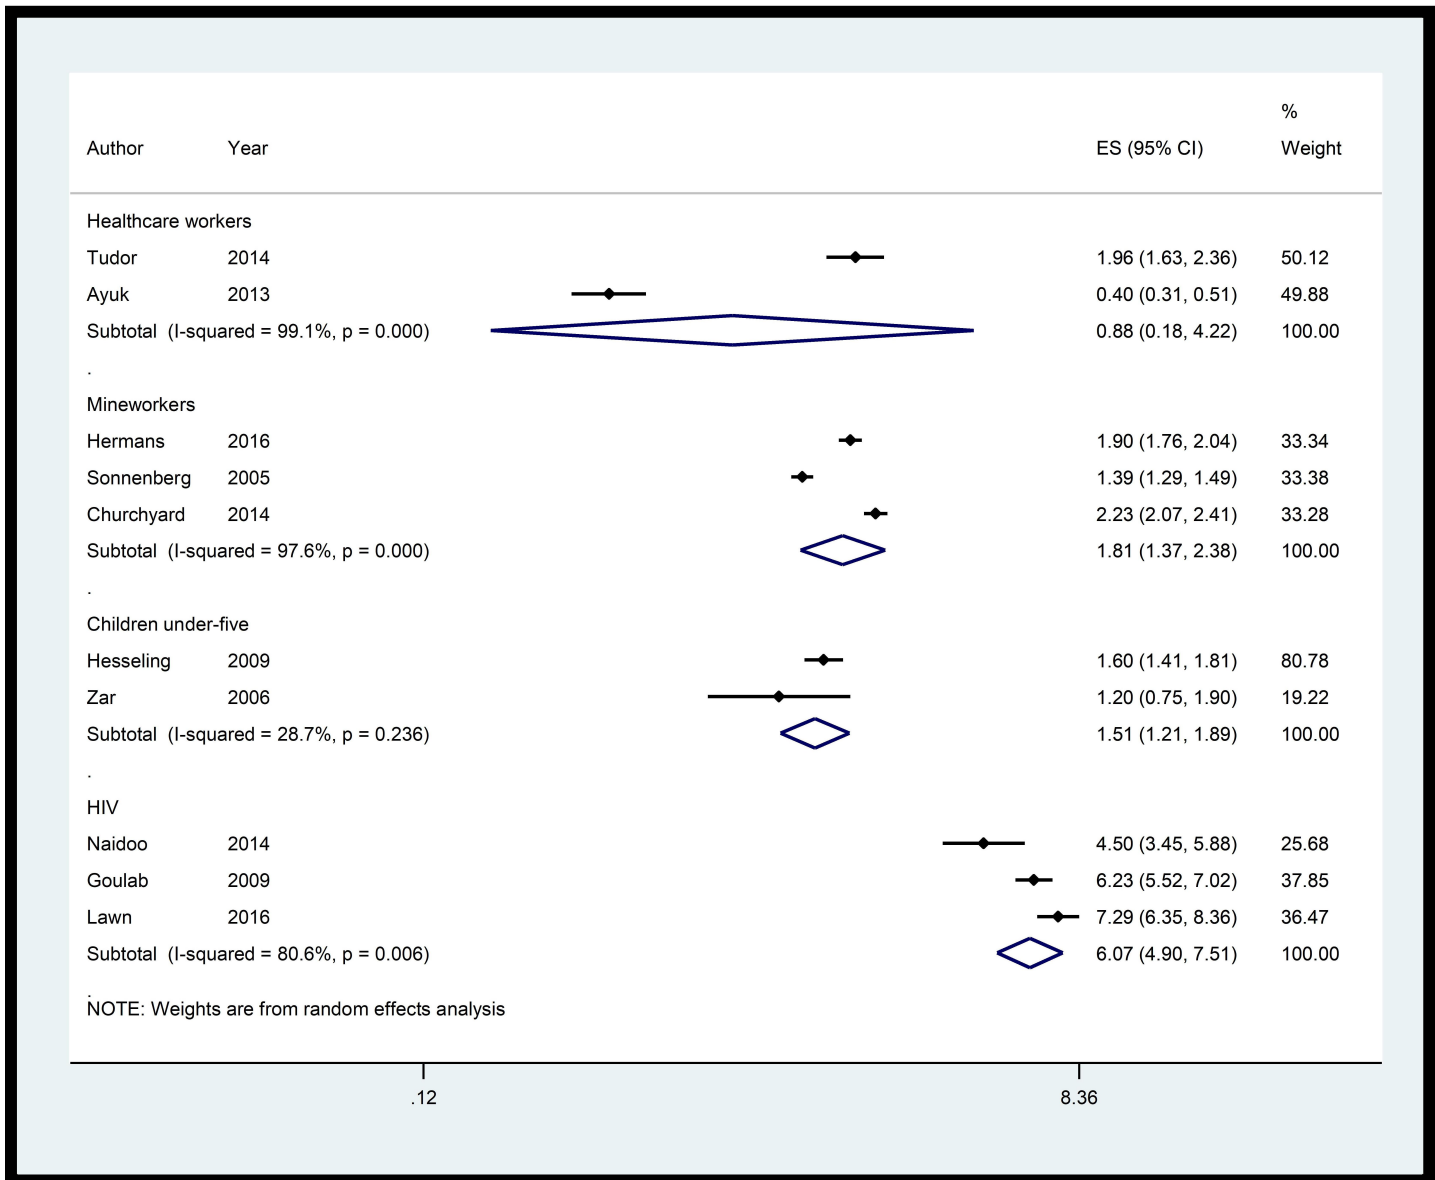

Supplement: bmjgh-2020-002355supp003.pdf [file bmjgh-2020-002355supp003.pdf]
